# Supplementary material for: Fluoride ion complexation by a B2/Hg heteronuclear tridentate lewis acid
Source: Royal Society of Chemistry journal article supplement (doi:10.1039/b801040d), 2008-01-01
Supplement: b801040d.pdf [file b801040d.pdf]

Supplementary Material (ESI) for Dalton Transactions  
This journal is (c) The Royal Society of Chemistry 2008

**Fluoride Ion Complexation by a B<sub>2</sub>/Hg Heteronuclear Tridentate Lewis Acid**

Christopher L. Dorsey, Pawel Jewula, Todd W. Hudnall, James D. Hoefelmeyer, Thomas J. Taylor, Nicole R. Honesty, Ching-Wen Chiu, Marcus Schulte, François P. Gabbaï\*

*Chemistry TAMU 3255, Texas A&M University, College Station, Texas 77843-3255.  
Email: francois@tamu.edu*

[Supplementary information](#)

#### Titration of **1** in CHCl<sub>3</sub>

A solution of **1** (3.0 mL,  $5.1896 \times 10^{-5}$  M, in chloroform) was titrated with incremental amounts of fluoride anions by addition of a solution of TBAF in chloroform ( $1.90 \times 10^{-3}$  M). The absorption was monitored at  $\lambda_{\max} = 362$  nm ( $\epsilon = 13,000$ ). The experimental data obtained was fitted by hand to a 1:1 binding isotherm to afford a stability constant for **1**-F of  $K = 5.00 \times 10^5 \pm (0.2) \text{ M}^{-1}$ . (See Table S1, Figure S1).

**Table S1.** Absorbance of a solution of **1** after successive additions of fluoride ions in chloroform

| C <sub>Fluoride</sub> | Abs <sub>exp</sub> | Abs <sub>calc</sub> | C <sub>Fluoride</sub> | Abs <sub>exp</sub> | Abs <sub>calc</sub> |
|-----------------------|--------------------|---------------------|-----------------------|--------------------|---------------------|
| 0.0000E 00            | 0.67664            | 6.7464E-01          | 8.4713E-05            | 0.03337            | 3.9303E-02          |
| 1.2583E-05            | 0.53519            | 5.1547E-01          | 9.6203E-05            | 0.02990            | 3.2877E-02          |
| 2.5000E-05            | 0.40319            | 3.6452E-01          | ---                   | ---                | ---                 |
| 3.7255E-05            | 0.23099            | 2.2987E-01          | ---                   | ---                | ---                 |
| 4.9351E-05            | 0.13563            | 1.2954E-01          | ---                   | ---                | ---                 |
| 6.1290E-05            | 0.07752            | 7.5490E-02          | ---                   | ---                | ---                 |
| 7.3077E-05            | 0.04419            | 5.1115E-02          | ---                   | ---                | ---                 |

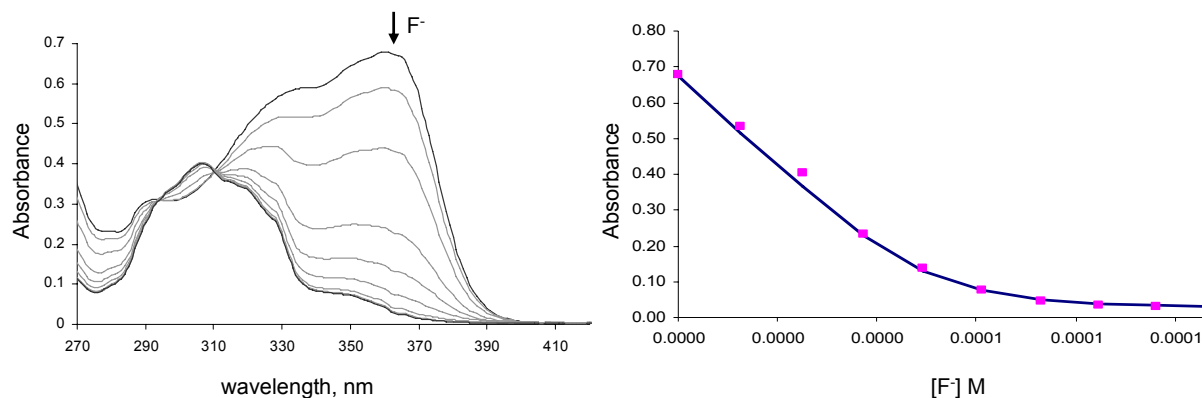

**Figure S1.** (left): Changes in the UV-vis absorption spectrum of **1** (3.0 mL,  $5.1896 \times 10^{-5}$  M, in chloroform) upon addition of a TBAF solution ( $1.90 \times 10^{-2}$  M, in chloroform). (right): 1:1 binding isotherm for the formation of **1**-F.

#### Titration of **2** in CHCl<sub>3</sub>

A solution of **2** (3.0 mL,  $5.00 \times 10^{-5}$  M, in chloroform) was titrated with incremental amounts of fluoride anions by addition of a solution of TBAF in chloroform ( $3.02 \times 10^{-2}$  M). The absorption was monitored at  $\lambda_{\max} = 365$  nm ( $\epsilon = 8350$ ). The experimental data obtained was fitted by hand to a 1:1 binding isotherm to afford a stability constant for **2**-F of  $K = 1.00 \times 10^3 \pm (0.2) \text{ M}^{-1}$ . (See Table S2, Figure S2).

**Table S2.** Absorbance of a solution of **2** after successive additions of fluoride ions in chloroform

| $C_{\text{Fluoride}}$ | $Abs_{\text{exp}}$ | $Abs_{\text{calc}}$ | $C_{\text{Fluoride}}$ | $Abs_{\text{exp}}$ | $Abs_{\text{calc}}$ |
|-----------------------|--------------------|---------------------|-----------------------|--------------------|---------------------|
| 0.0000E 00            | 0.421              | 4.1750E-01          | 3.4827E-04            | 0.342              | 3.3604E-01          |
| 5.0250E-05            | 0.384              | 4.0157E-01          | 3.9737E-04            | 0.336              | 3.2875E-01          |
| 1.0033E-04            | 0.373              | 3.8738E-01          | 4.4631E-04            | 0.330              | 3.2221E-01          |
| 1.5025E-04            | 0.367              | 3.7472E-01          | 4.9508E-04            | 0.325              | 3.1636E-01          |
| 2.0000E-04            | 0.360              | 3.6339E-01          | 5.4370E-04            | 0.320              | 3.1112E-01          |
| 2.4959E-04            | 0.354              | 3.5326E-01          | ---                   | ---                | ---                 |
| 2.9901E-04            | 0.348              | 3.4418E-01          | ---                   | ---                | ---                 |

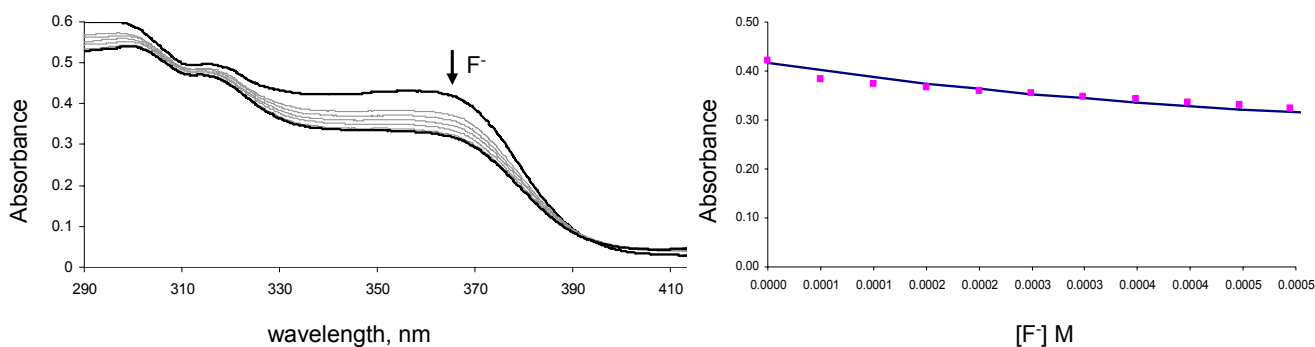

**Figure S2.** (left): Changes in the UV-vis absorption spectrum of **2** (3.0 mL,  $5.00 \times 10^{-5}$  M, in chloroform) upon addition of a TBAF solution ( $3.02 \times 10^{-2}$  M, in chloroform). (right): 1:1 binding isotherm for the formation of **2-F**.

#### Titration of **3** in $\text{CHCl}_3$

A solution of **3** (3.0 mL,  $2.525 \times 10^{-5}$  M, in chloroform) was titrated with incremental amounts of fluoride anions by addition of a solution of TABF in chloroform ( $3.02 \times 10^{-2}$  M). The absorption was monitored at  $\lambda_{\text{max}} = 360$  nm ( $\epsilon = 27,800$ ). The experimental data obtained was fitted by hand to a 1:1 binding isotherm to afford a stability constant for **3-F** of  $K = 1.7 \times 10^3 \pm (0.1) \text{ M}^{-1}$ . (See Table S3, Figure S3).

**Table S3.** Absorbance of a solution of **3** after successive additions of fluoride ions in chloroform

| $C_{\text{Fluoride}}$ | $Abs_{\text{exp}}$ | $Abs_{\text{calc}}$ | $C_{\text{Fluoride}}$ | $Abs_{\text{exp}}$ | $Abs_{\text{calc}}$ |
|-----------------------|--------------------|---------------------|-----------------------|--------------------|---------------------|
| 0.0000E 00            | 0.704              | 7.0195E-01          | 3.4827E-04            | 0.597              | 6.0181E-01          |
| 5.0250E-05            | 0.677              | 6.7920E-01          | 3.9737E-04            | 0.586              | 5.9491E-01          |
| 1.0033E-04            | 0.655              | 6.6023E-01          | 4.4631E-04            | 0.578              | 5.8906E-01          |
| 1.5025E-04            | 0.644              | 6.4432E-01          | ---                   | ---                | ---                 |
| 2.0000E-04            | 0.631              | 6.3091E-01          | ---                   | ---                | ---                 |
| 2.4959E-04            | 0.619              | 6.1957E-01          | ---                   | ---                | ---                 |
| 2.9901E-04            | 0.609              | 6.0996E-01          | ---                   | ---                | ---                 |

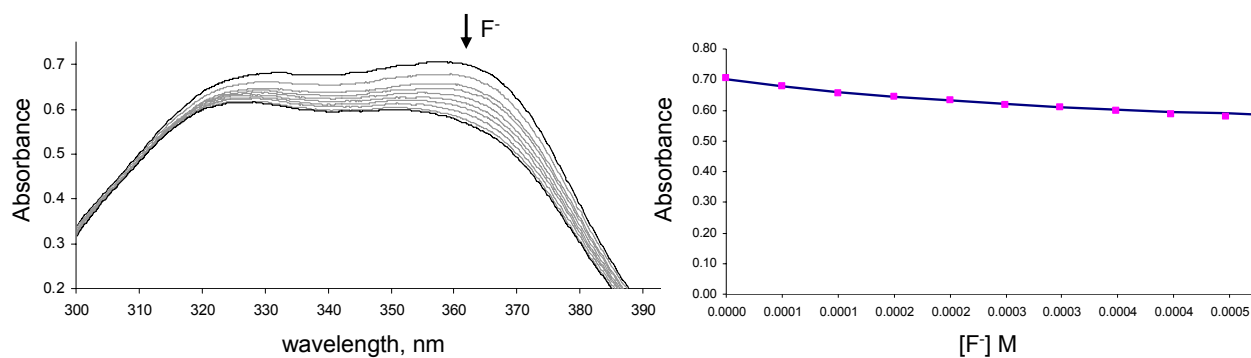

**Figure S3.** (left): Changes in the UV-vis absorption spectrum of **3** (3.0 mL,  $2.525 \times 10^{-5}$  M, in chloroform) upon addition of a TBAF solution ( $3.02 \times 10^{-2}$  M, in chloroform). (right): 1:1 binding isotherm for the formation of **3-F**.

### Computational details:

All energies, expressed in hartrees, are reported for standard conditions, 298 K and 1 atm., and include the vibrational and thermodynamic correction. For each structure, the numbering of the atoms follows their order of appearance in the Cartesian coordinate list. The energy corrected to enthalpy for the fluoride anion was found to be equal to -99.886333 hartrees.

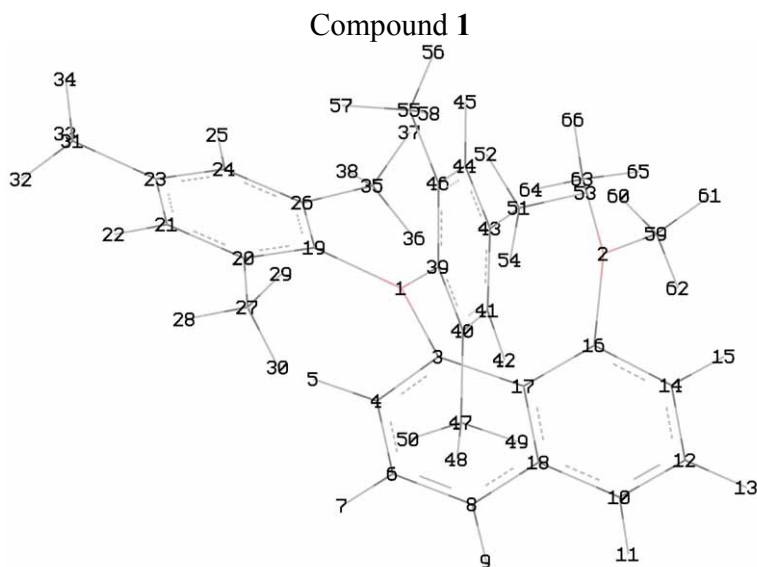

Energy Corrected for Enthalpy: -1213.167739

#### Cartesian Coordinates:

|   |           |           |           |   |           |           |           |
|---|-----------|-----------|-----------|---|-----------|-----------|-----------|
| B | 0.452371  | -0.213231 | -0.111461 | H | 4.904264  | 0.365913  | -1.713443 |
| B | -2.258687 | 0.421831  | 1.669921  | C | 4.879929  | -0.77624  | 0.109101  |
| C | -0.437183 | -1.508975 | -0.2889   | C | 4.041709  | -1.333813 | 1.079518  |
| C | 0.238233  | -2.548892 | -0.950522 | H | 4.480176  | -1.913965 | 1.888457  |
| H | 1.302188  | -2.443827 | -1.12787  | C | 2.647073  | -1.17724  | 1.041034  |
| C | -0.399526 | -3.71331  | -1.428566 | C | 2.361071  | 0.92887   | -2.183086 |
| H | 0.178311  | -4.473969 | -1.943871 | H | 3.14989   | 1.066304  | -2.929912 |
| C | -1.75563  | -3.856289 | -1.250587 | H | 2.004718  | 1.921864  | -1.888337 |
| H | -2.278387 | -4.729396 | -1.632012 | H | 1.525116  | 0.423934  | -2.679639 |
| C | -3.914458 | -3.045128 | -0.429363 | C | 6.381845  | -0.93842  | 0.182149  |
| H | -4.36049  | -3.947763 | -0.837837 | H | 6.829765  | -0.982281 | -0.816748 |
| C | -4.689424 | -2.091815 | 0.187771  | H | 6.6601    | -1.851581 | 0.719186  |
| H | -5.7645   | -2.215986 | 0.272046  | H | 6.848508  | -0.095131 | 0.710059  |
| C | -4.066608 | -0.94341  | 0.725979  | C | 1.856484  | -1.801718 | 2.174975  |
| H | -4.694345 | -0.209676 | 1.222625  | H | 0.902366  | -2.213874 | 1.839678  |
| C | -2.681827 | -0.731884 | 0.684901  | H | 1.639303  | -1.067369 | 2.962734  |
| C | -1.860768 | -1.683865 | -0.033281 | H | 2.427593  | -2.610673 | 2.642697  |
| C | -2.509176 | -2.861675 | -0.566042 | C | -0.10388  | 1.26864   | -0.243574 |
| C | 2.03302   | -0.41763  | 0.000964  | C | -0.996784 | 1.645311  | -1.299603 |
| C | 2.891196  | 0.140787  | -0.996877 | C | -1.364907 | 2.988959  | -1.46896  |
| C | 4.278392  | -0.053627 | -0.929051 | H | -2.026684 | 3.249124  | -2.291529 |

Supplementary Material (ESI) for Dalton Transactions  
This journal is (c) The Royal Society of Chemistry 2008

|   |           |           |           |   |           |           |          |
|---|-----------|-----------|-----------|---|-----------|-----------|----------|
| C | -0.902909 | 4.002953  | -0.623289 | C | 1.407455  | 2.080487  | 1.70448  |
| C | -0.01932  | 3.641837  | 0.402501  | H | 1.393779  | 2.916537  | 2.412018 |
| H | 0.367288  | 4.414206  | 1.063348  | H | 2.425083  | 1.999198  | 1.305687 |
| C | 0.399224  | 2.317999  | 0.593459  | H | 1.21133   | 1.166709  | 2.268062 |
| C | -1.547918 | 0.665143  | -2.320149 | C | -3.042402 | 1.799316  | 1.691494 |
| H | -1.839689 | 1.196781  | -3.231858 | H | -2.322871 | 2.624766  | 1.605977 |
| H | -2.437038 | 0.150234  | -1.939623 | H | -3.540906 | 1.934532  | 2.664993 |
| H | -0.827721 | -0.107886 | -2.598636 | H | -3.786702 | 1.919287  | 0.896671 |
| C | -1.348607 | 5.436642  | -0.800548 | C | -1.34445  | 0.08114   | 2.917557 |
| H | -0.553452 | 6.139874  | -0.529451 | H | -0.594586 | -0.695479 | 2.748187 |
| H | -2.214104 | 5.66375   | -0.163046 | H | -2.040804 | -0.322008 | 3.675004 |
| H | -1.644431 | 5.638755  | -1.835313 | H | -0.870615 | 0.961179  | 3.368482 |

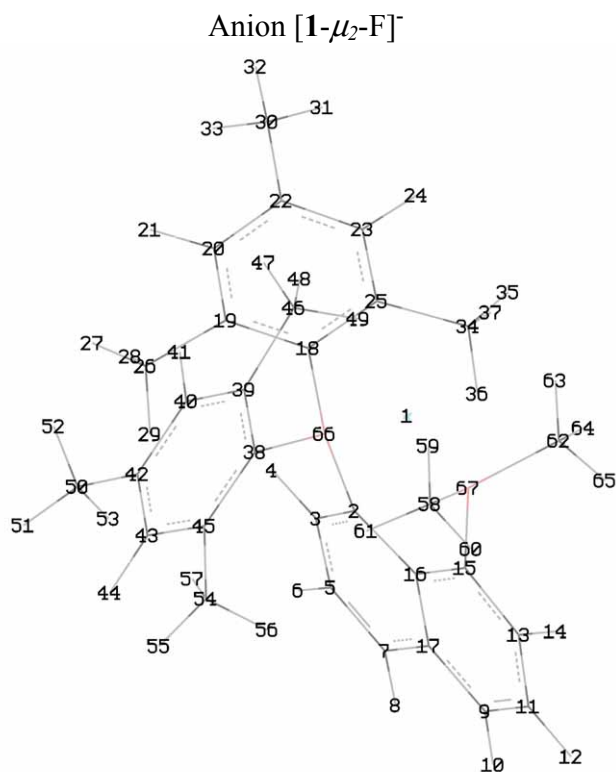

Energy Corrected for Enthalpy: -1313.173708

Cartesian Coordinates:

|   |           |           |           |   |          |           |           |
|---|-----------|-----------|-----------|---|----------|-----------|-----------|
| F | -0.264756 | -0.165315 | 1.573713  | C | 4.387653 | -2.029565 | 0.050203  |
| C | -0.75392  | -1.040275 | -0.754381 | C | 3.352906 | -2.503442 | 0.86037   |
| C | -0.291609 | -1.676371 | -1.906355 | H | 3.530617 | -3.372736 | 1.4918    |
| H | 0.757457  | -1.584126 | -2.171099 | C | 2.077537 | -1.912191 | 0.874877  |
| C | -1.13363  | -2.422841 | -2.764995 | C | 2.678196 | 0.815831  | -1.791918 |
| H | -0.71809  | -2.88676  | -3.65686  | H | 3.511334 | 0.804273  | -2.505618 |
| C | -2.474915 | -2.54148  | -2.47674  | H | 2.66615  | 1.795625  | -1.304015 |
| H | -3.144313 | -3.088391 | -3.137957 | H | 1.748884 | 0.74018   | -2.363021 |
| C | -4.395711 | -2.097026 | -0.996078 | C | 5.76377  | -2.660197 | 0.074778  |
| H | -5.027742 | -2.639987 | -1.695984 | H | 5.722305 | -3.692615 | 0.441848  |
| C | -4.918578 | -1.549847 | 0.155805  | H | 6.451994 | -2.109098 | 0.732749  |
| H | -5.979019 | -1.645623 | 0.379322  | H | 6.217703 | -2.674943 | -0.92409  |
| C | -4.065931 | -0.884406 | 1.066813  | C | 1.043403 | -2.582233 | 1.761652  |
| H | -4.4973   | -0.501223 | 1.98895   | H | 1.397739 | -3.572767 | 2.071818  |
| C | -2.695538 | -0.723515 | 0.846895  | H | 0.089018 | -2.707548 | 1.243312  |
| C | -2.143942 | -1.232282 | -0.389075 | H | 0.834248 | -1.998598 | 2.662706  |
| C | -3.01069  | -1.961349 | -1.291732 | C | 0.237803 | 1.554268  | -0.179954 |
| C | 1.786903  | -0.765383 | 0.070562  | C | 0.929843 | 2.396407  | 0.750626  |
| C | 2.836944  | -0.322462 | -0.794393 | C | 0.928756 | 3.793791  | 0.608049  |
| C | 4.096095  | -0.949315 | -0.786381 | H | 1.47396  | 4.393379  | 1.33554   |
| H | 4.865733  | -0.58165  | -1.463766 | C | 0.248378 | 4.436226  | -0.429778 |

Supplementary Material (ESI) for Dalton Transactions  
This journal is (c) The Royal Society of Chemistry 2008

|   |           |          |           |   |           |           |           |
|---|-----------|----------|-----------|---|-----------|-----------|-----------|
| C | -0.427775 | 3.625913 | -1.343675 | H | -2.071866 | 0.945021  | -1.937319 |
| H | -0.960276 | 4.093656 | -2.17032  | H | -0.60545  | 0.78263   | -2.880346 |
| C | -0.4466   | 2.221907 | -1.241481 | C | -2.159515 | 1.505462  | 2.316406  |
| C | 1.687497  | 1.858388 | 1.954073  | H | -1.49364  | 1.927958  | 3.084504  |
| H | 2.361668  | 2.626341 | 2.352543  | H | -3.191829 | 1.603189  | 2.691501  |
| H | 2.279603  | 0.97401  | 1.710852  | H | -2.075816 | 2.125322  | 1.415892  |
| H | 0.997387  | 1.566368 | 2.753084  | C | -1.854144 | -0.954294 | 3.406466  |
| C | 0.221609  | 5.945816 | -0.540821 | H | -1.133168 | -0.560266 | 4.140318  |
| H | 0.142712  | 6.270391 | -1.58557  | H | -1.61752  | -2.012356 | 3.227944  |
| H | 1.127151  | 6.394823 | -0.114985 | H | -2.850961 | -0.914951 | 3.874572  |
| H | -0.636132 | 6.375975 | -0.002893 | B | 0.278942  | -0.082246 | 0.061597  |
| C | -1.220429 | 1.504526 | -2.335051 | B | -1.857041 | -0.061872 | 2.050736  |
| H | -1.60545  | 2.232543 | -3.059088 |   |           |           |           |



Compound 2

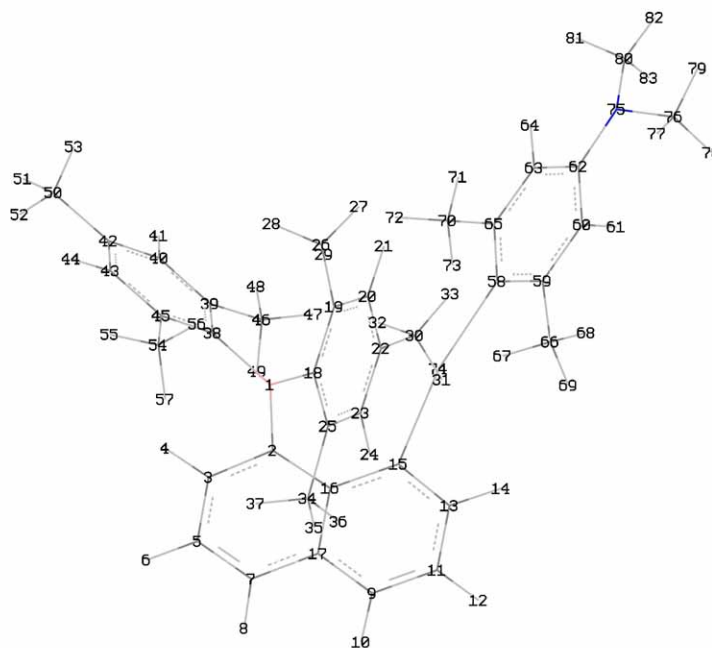

Energy Corrected for Enthalpy: -1705.702492

Cartesian Coordinates:

|   |           |           |           |   |           |           |           |
|---|-----------|-----------|-----------|---|-----------|-----------|-----------|
| B | -2.194834 | 0.470399  | 0.40143   | C | 0.264023  | 2.344876  | 0.612248  |
| C | -2.978994 | -0.768143 | -0.19239  | H | 1.327433  | 2.602082  | 0.641831  |
| C | -4.362961 | -0.542324 | -0.214385 | H | -0.312066 | 3.264028  | 0.773067  |
| H | -4.734252 | 0.45227   | 0.009392  | H | 0.037402  | 2.005368  | -0.399373 |
| C | -5.307537 | -1.557621 | -0.487559 | C | 1.523515  | 0.447527  | 5.071122  |
| H | -6.368577 | -1.329543 | -0.462633 | H | 1.566352  | -0.527047 | 5.568826  |
| C | -4.865578 | -2.824645 | -0.787101 | H | 1.165437  | 1.176391  | 5.811291  |
| H | -5.570087 | -3.624198 | -1.000976 | H | 2.543898  | 0.737272  | 4.798054  |
| C | -3.058427 | -4.428216 | -1.207021 | C | -2.458214 | -1.532702 | 2.763102  |
| H | -3.821745 | -5.174944 | -1.409106 | H | -2.516201 | -1.953795 | 3.771867  |
| C | -1.722584 | -4.741401 | -1.303373 | H | -2.308893 | -2.361715 | 2.064084  |
| H | -1.404101 | -5.743099 | -1.576516 | H | -3.431941 | -1.093494 | 2.52818   |
| C | -0.7573   | -3.734722 | -1.059613 | C | -2.669993 | 1.894757  | -0.12373  |
| H | 0.28893   | -4.012363 | -1.167991 | C | -2.606379 | 2.220539  | -1.511214 |
| C | -1.097906 | -2.425286 | -0.705078 | C | -3.02267  | 3.479937  | -1.961323 |
| C | -2.493126 | -2.085545 | -0.565822 | H | -2.943741 | 3.712176  | -3.021191 |
| C | -3.472626 | -3.11486  | -0.849569 | C | -3.546836 | 4.44301   | -1.087195 |
| C | -1.145451 | 0.384256  | 1.587917  | C | -3.636624 | 4.112489  | 0.269324  |
| C | -0.048659 | 1.306475  | 1.677127  | H | -4.052946 | 4.838179  | 0.964201  |
| C | 0.809201  | 1.287345  | 2.786875  | C | -3.202149 | 2.871775  | 0.764499  |
| H | 1.649114  | 1.977208  | 2.808808  | C | -2.074457 | 1.238695  | -2.540042 |
| C | 0.617537  | 0.411461  | 3.861241  | H | -1.099609 | 0.823091  | -2.25796  |
| C | -0.457586 | -0.482984 | 3.787055  | H | -1.951205 | 1.726783  | -3.512461 |
| H | -0.630061 | -1.169009 | 4.612772  | H | -2.751457 | 0.38768   | -2.672793 |
| C | -1.32615  | -0.523851 | 2.686388  | C | -4.017312 | 5.785125  | -1.602678 |

Supplementary Material (ESI) for Dalton Transactions  
This journal is (c) The Royal Society of Chemistry 2008

|   |           |           |           |    |          |           |           |
|---|-----------|-----------|-----------|----|----------|-----------|-----------|
| H | -4.243874 | 6.471214  | -0.780369 | H  | 4.004908 | -1.754952 | 2.28081   |
| H | -4.926757 | 5.683336  | -2.209903 | H  | 2.94034  | -2.625894 | 1.171132  |
| H | -3.258909 | 6.25891   | -2.237715 | C  | 2.128597 | 0.912987  | -2.73544  |
| C | -3.343693 | 2.621257  | 2.25668   | H  | 2.670382 | 1.430033  | -3.534738 |
| H | -3.972703 | 3.391419  | 2.715049  | H  | 1.332285 | 1.586393  | -2.39211  |
| H | -2.373516 | 2.636673  | 2.766301  | H  | 1.645241 | 0.033175  | -3.178784 |
| H | -3.801595 | 1.649733  | 2.474714  | Hg | 0.667916 | -1.204906 | -0.54413  |
| C | 2.627287  | -0.337387 | -0.562612 | N  | 6.560511 | 1.327969  | -0.548229 |
| C | 3.555834  | -0.668447 | 0.454122  | C  | 7.573223 | 0.712098  | 0.312621  |
| C | 4.850089  | -0.132174 | 0.443872  | H  | 7.267616 | 0.759923  | 1.362014  |
| H | 5.528488  | -0.419251 | 1.237238  | H  | 7.77245  | -0.342952 | 0.059567  |
| C | 5.277033  | 0.755479  | -0.570028 | H  | 8.504806 | 1.274344  | 0.217339  |
| C | 4.35489   | 1.05477   | -1.59746  | C  | 7.066073 | 1.929393  | -1.784526 |
| H | 4.641056  | 1.706083  | -2.413476 | H  | 6.428613 | 2.761964  | -2.096327 |
| C | 3.055969  | 0.526692  | -1.597632 | H  | 8.063263 | 2.333733  | -1.596818 |
| C | 3.182485  | -1.630342 | 1.567903  | H  | 7.129465 | 1.212085  | -2.620213 |
| H | 2.308796  | -1.276365 | 2.127983  |    |          |           |           |

Anion [ $2-\mu_2-F$ ]<sup>-</sup>

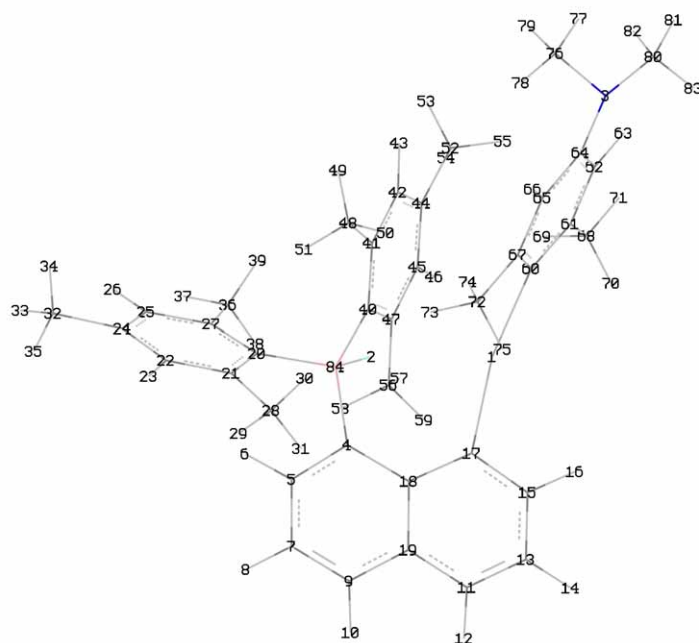

Energy Corrected for Enthalpy: -1805.697313

Cartesian Coordinates:

|    |           |           |           |   |           |           |           |
|----|-----------|-----------|-----------|---|-----------|-----------|-----------|
| Hg | -0.825323 | -1.39764  | -0.381896 | H | 4.507289  | 4.441887  | 1.055355  |
| F  | 0.834118  | 0.384519  | -1.103119 | C | 3.364657  | 2.664314  | 0.639491  |
| N  | -6.586519 | 1.424274  | -1.066661 | C | 2.650579  | 1.265144  | -2.882322 |
| C  | 2.783095  | -0.927177 | -0.134709 | H | 3.228857  | 1.533523  | -3.775833 |
| C  | 4.1687    | -0.75011  | -0.074867 | H | 1.586764  | 1.381726  | -3.11337  |
| H  | 4.55341   | 0.25507   | 0.054695  | H | 2.806295  | 0.203444  | -2.675495 |
| C  | 5.111775  | -1.798441 | -0.181418 | C | 5.052776  | 5.4223    | -1.443291 |
| H  | 6.174649  | -1.574085 | -0.12546  | H | 5.748898  | 5.727307  | -0.652442 |
| C  | 4.67503   | -3.088339 | -0.361084 | H | 4.367091  | 6.265636  | -1.614051 |
| H  | 5.375997  | -3.916252 | -0.448501 | H | 5.629747  | 5.285673  | -2.36647  |
| C  | 2.869115  | -4.720066 | -0.591078 | C | 3.26641   | 2.403868  | 2.134555  |
| H  | 3.638997  | -5.485019 | -0.673697 | H | 3.993764  | 3.025676  | 2.671559  |
| C  | 1.53626   | -5.053849 | -0.626172 | H | 3.473242  | 1.359785  | 2.384039  |
| H  | 1.221851  | -6.088962 | -0.740036 | H | 2.271971  | 2.632197  | 2.53108   |
| C  | 0.568541  | -4.025821 | -0.512085 | C | 0.931336  | 0.622086  | 1.385505  |
| H  | -0.478974 | -4.318855 | -0.5403   | C | -0.089801 | 1.632504  | 1.390312  |
| C  | 0.904235  | -2.675436 | -0.374078 | C | -0.899473 | 1.84767   | 2.519621  |
| C  | 2.302862  | -2.295065 | -0.322702 | H | -1.653224 | 2.632525  | 2.478506  |
| C  | 3.281478  | -3.365923 | -0.431211 | C | -0.764689 | 1.093851  | 3.688945  |
| C  | 2.791139  | 1.801101  | -0.343903 | C | 0.234734  | 0.117428  | 3.704713  |
| C  | 3.074633  | 2.135138  | -1.708726 | H | 0.38447   | -0.468681 | 4.610431  |
| C  | 3.804219  | 3.290623  | -2.037498 | C | 1.073493  | -0.124755 | 2.600052  |
| H  | 3.99496   | 3.504944  | -3.088553 | C | -0.367231 | 2.541073  | 0.202704  |
| C  | 4.306101  | 4.160646  | -1.064992 | H | -0.877483 | 3.452629  | 0.538956  |
| C  | 4.091615  | 3.811664  | 0.269967  | H | -1.017439 | 2.045474  | -0.52609  |

Supplementary Material (ESI) for Dalton Transactions  
This journal is (c) The Royal Society of Chemistry 2008

|   |           |           |           |
|---|-----------|-----------|-----------|
| H | 0.545357  | 2.825976  | -0.321761 |
| C | -1.670207 | 1.318284  | 4.881551  |
| H | -1.947446 | 2.375006  | 4.9804    |
| H | -1.186771 | 1.006239  | 5.815111  |
| H | -2.605438 | 0.746369  | 4.791904  |
| C | 2.137207  | -1.188508 | 2.819763  |
| H | 2.177369  | -1.462166 | 3.881255  |
| H | 3.133529  | -0.85491  | 2.518908  |
| H | 1.929421  | -2.097866 | 2.247801  |
| C | -2.766079 | -0.470179 | -0.575392 |
| C | -3.723427 | -0.514015 | 0.461122  |
| C | -4.974416 | 0.115854  | 0.313835  |
| H | -5.671083 | 0.079971  | 1.144024  |
| C | -5.312507 | 0.794575  | -0.86809  |
| C | -4.366553 | 0.816989  | -1.910068 |
| H | -4.62252  | 1.297471  | -2.850402 |
| C | -3.115012 | 0.202424  | -1.775961 |
| C | -3.416324 | -1.217279 | 1.770298  |
| H | -2.566641 | -0.746793 | 2.279748  |
| H | -3.153576 | -2.270424 | 1.604212  |
| H | -4.2756   | -1.190638 | 2.451532  |
| C | -2.146623 | 0.251355  | -2.944    |
| H | -1.171499 | 0.647144  | -2.637568 |
| H | -2.531485 | 0.879242  | -3.756263 |
| H | -1.970243 | -0.752545 | -3.35483  |
| C | -6.523617 | 2.854728  | -1.410151 |
| H | -7.506601 | 3.182677  | -1.767669 |
| H | -5.797382 | 3.022763  | -2.205727 |
| H | -6.237589 | 3.4823    | -0.545353 |
| C | -7.598902 | 1.174238  | -0.04233  |
| H | -8.556752 | 1.572884  | -0.394408 |
| H | -7.371034 | 1.646176  | 0.932639  |
| H | -7.711521 | 0.098144  | 0.114178  |
| B | 1.864009  | 0.452118  | 0.007298  |

Supplementary Material (ESI) for Dalton Transactions  
This journal is (c) The Royal Society of Chemistry 2008

Compound 3

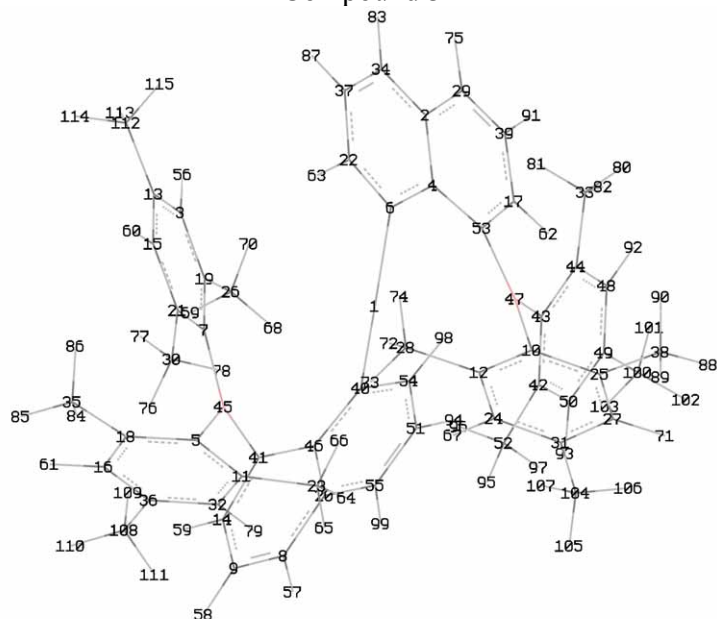

Energy Corrected for Enthalpy: -2370.078437

Cartesian Coordinates:

|    |           |           |           |   |           |           |           |
|----|-----------|-----------|-----------|---|-----------|-----------|-----------|
| Hg | -0.000053 | -1.234561 | -0.000031 | C | -4.963022 | 3.6886    | -0.855631 |
| C  | -2.36277  | -1.26148  | 3.930943  | C | -1.347057 | 2.743858  | 1.288369  |
| C  | 2.951438  | -1.202299 | 3.144671  | C | -3.405387 | -0.615021 | 4.655408  |
| C  | -2.081819 | -0.896805 | 2.555306  | C | 4.505728  | -2.327189 | -0.720954 |
| C  | 3.48648   | 1.969339  | -0.082593 | C | -4.084713 | 4.713575  | -0.482898 |
| C  | -0.952063 | -1.526324 | 1.914453  | C | 2.916672  | 4.353745  | -0.199846 |
| C  | 3.222883  | -0.622163 | 0.766901  | C | -4.506475 | -2.326091 | 0.721387  |
| C  | 3.405773  | -0.615998 | -4.655326 | C | -1.605051 | -2.272413 | 4.584315  |
| C  | 4.16096   | 0.372395  | -4.0715   | C | 5.715215  | 1.313981  | 1.048229  |
| C  | -3.485914 | 1.969915  | 0.082396  | C | 4.085727  | 4.712891  | 0.482769  |
| C  | 2.616823  | 3.018094  | -0.502509 | C | -0.581442 | -2.914307 | 3.927815  |
| C  | -2.615835 | 3.01855   | 0.501986  | C | -5.715058 | 1.315028  | -1.047843 |
| C  | 3.640168  | -2.409987 | 2.97961   | C | -4.160256 | 0.37364   | 4.071623  |
| C  | 3.91907   | 0.716743  | -2.722689 | C | 0.951833  | -1.526314 | -1.914587 |
| C  | 4.107252  | -2.720968 | 1.697632  | C | 2.949011  | 0.08711   | -1.927913 |
| C  | 4.963794  | 3.687701  | 0.855762  | C | -2.747378 | -0.310646 | -2.083063 |
| C  | -3.91842  | 0.717807  | 2.722755  | C | -3.223143 | -0.621725 | -0.766802 |
| C  | 4.68397   | 2.336349  | 0.599841  | C | -3.911174 | -1.868772 | -0.598492 |
| C  | 2.747177  | -0.310728 | 2.083162  | B | 3.140891  | 0.44782   | -0.402018 |
| C  | 2.36282   | -1.262013 | -3.930957 | C | 2.081876  | -0.897209 | -2.55535  |
| C  | 3.910418  | -1.869457 | 0.598782  | B | -3.140654 | 0.448354  | 0.40199   |
| C  | -0.256701 | -2.523662 | 2.606854  | C | -4.108491 | -2.720265 | -1.69721  |
| C  | 1.348235  | 2.743846  | -1.289373 | C | -3.641427 | -2.40955  | -2.979314 |
| C  | -2.915442 | 4.354192  | 0.199379  | C | -2.952103 | -1.202269 | -3.1445   |
| C  | -4.68343  | 2.337125  | -0.599718 | C | 0.580747  | -2.914042 | -3.928049 |
| C  | 2.002082  | 0.971212  | 2.415656  | C | -2.001732 | 0.970922  | -2.415765 |

Supplementary Material (ESI) for Dalton Transactions  
This journal is (c) The Royal Society of Chemistry 2008

|   |           |           |           |   |           |           |           |
|---|-----------|-----------|-----------|---|-----------|-----------|-----------|
| C | -2.948687 | 0.087772  | 1.927903  | H | 6.657835  | 1.811172  | 1.300116  |
| C | 0.256077  | -2.523302 | -2.607099 | H | 5.383707  | 0.760748  | 1.934169  |
| C | 1.604732  | -2.272615 | -4.584414 | H | -0.008794 | -3.697    | 4.416655  |
| H | 2.55505   | -0.947861 | 4.12458   | H | -6.657627 | 1.812466  | -1.299439 |
| H | 3.580751  | -0.91636  | -5.685187 | H | -5.383948 | 0.76175   | -1.933905 |
| H | 4.941252  | 0.881417  | -4.628629 | H | -5.930987 | 0.572551  | -0.272035 |
| H | 4.537393  | 1.487588  | -2.275727 | H | -4.940283 | 0.882994  | 4.628819  |
| H | 4.65076   | -3.650463 | 1.546009  | H | -4.652304 | -3.649562 | -1.545418 |
| H | 5.892531  | 3.944204  | 1.360501  | H | -2.555587 | -0.948154 | -4.124432 |
| H | -4.536538 | 1.488828  | 2.275812  | H | 0.007754  | -3.696425 | -4.416973 |
| H | 0.591486  | -3.017336 | 2.140871  | H | -1.352206 | 0.81332   | -3.283004 |
| H | 0.65231   | 3.585637  | -1.213742 | H | -1.374626 | 1.324885  | -1.595795 |
| H | 1.564911  | 2.583003  | -2.352293 | H | -2.694643 | 1.786071  | -2.65689  |
| H | 0.824917  | 1.849289  | -0.940595 | H | -0.592388 | -3.016609 | -2.141237 |
| H | -2.224666 | 5.132982  | 0.515346  | H | 1.854851  | -2.524733 | -5.611548 |
| H | 1.375039  | 1.325237  | 1.595665  | C | -3.884423 | -3.334936 | -4.15013  |
| H | 2.695341  | 1.786145  | 2.656504  | H | -4.17091  | -4.337199 | -3.815347 |
| H | 1.352598  | 0.814067  | 3.28301   | H | -4.691823 | -2.958898 | -4.793139 |
| H | -5.891796 | 3.945297  | -1.360183 | H | -2.990541 | -3.427328 | -4.778147 |
| H | -0.82342  | 1.849964  | 0.938314  | C | -4.381317 | 6.158429  | -0.817759 |
| H | -0.651475 | 3.586016  | 1.213703  | H | -3.940147 | 6.441976  | -1.783437 |
| H | -1.563507 | 2.581521  | 2.351095  | H | -5.459196 | 6.340136  | -0.887544 |
| H | -3.580369 | -0.915274 | 5.6853    | H | -3.97054  | 6.837191  | -0.062229 |
| H | 5.095932  | -1.546763 | -1.210705 | C | 4.382649  | 6.157583  | 0.818039  |
| H | 5.161791  | -3.188309 | -0.557443 | H | 3.955698  | 6.436209  | 1.791516  |
| H | 3.730207  | -2.630351 | -1.431689 | H | 5.460899  | 6.342763  | 0.871885  |
| H | 2.226185  | 5.132684  | -0.516052 | H | 3.957987  | 6.837473  | 0.071335  |
| H | -5.162713 | -3.187124 | 0.558125  | C | 3.881868  | -3.335621 | 4.150503  |
| H | -3.730967 | -2.629218 | 1.432145  | H | 4.181482  | -4.334107 | 3.816039  |
| H | -5.096511 | -1.545434 | 1.210985  | H | 4.679223  | -2.952842 | 4.801957  |
| H | -1.855168 | -2.524432 | 5.611472  | H | 2.983147  | -3.438649 | 4.770007  |
| H | 5.931173  | 0.571479  | 0.272451  |   |           |           |           |

Anion [**3**- $\mu_2$ -F]<sup>-</sup>

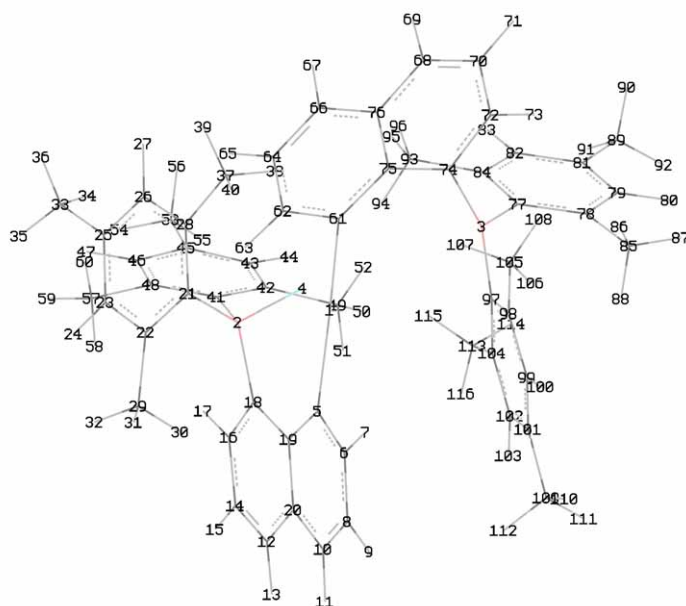

Energy Corrected for Enthalpy: -2470.078687

Cartesian Coordinates:

|    |           |           |           |   |          |           |           |
|----|-----------|-----------|-----------|---|----------|-----------|-----------|
| Hg | -0.148775 | -1.344393 | 0.076629  | C | 2.823757 | -1.503711 | -3.25141  |
| B  | 2.661006  | 0.453085  | 0.221158  | H | 2.536413 | -1.27823  | -4.277339 |
| B  | -3.137988 | 0.542236  | -0.365585 | C | 2.582432 | -0.538569 | -2.258245 |
| F  | 1.200042  | 0.818737  | -0.025685 | C | 4.132914 | -2.421919 | 0.743046  |
| C  | 0.782789  | -1.577837 | 2.006576  | H | 3.33071  | -2.693992 | 1.435613  |
| C  | 0.11686   | -2.530217 | 2.783571  | H | 4.700663 | -1.622549 | 1.224833  |
| H  | -0.718922 | -3.081314 | 2.360359  | H | 4.793002 | -3.291778 | 0.638233  |
| C  | 0.46064   | -2.803401 | 4.130144  | C | 3.636678 | -3.776576 | -4.0433   |
| H  | -0.091138 | -3.55424  | 4.691741  | H | 2.736094 | -4.387166 | -4.205553 |
| C  | 1.488388  | -2.099396 | 4.711824  | H | 4.449955 | -4.46229  | -3.777046 |
| H  | 1.769207  | -2.273245 | 5.74893   | H | 3.88668  | -3.311969 | -5.005141 |
| C  | 3.313581  | -0.476997 | 4.608541  | C | 1.920793 | 0.74167   | -2.742086 |
| H  | 3.513784  | -0.701246 | 5.654488  | H | 0.84002  | 0.715581  | -2.567441 |
| C  | 4.088681  | 0.414172  | 3.907785  | H | 2.079953 | 0.862043  | -3.821221 |
| H  | 4.918872  | 0.927211  | 4.387952  | H | 2.306108 | 1.626053  | -2.233887 |
| C  | 3.810356  | 0.65809   | 2.542702  | C | 3.520686 | 1.854974  | -0.092884 |
| H  | 4.455679  | 1.35462   | 2.019935  | C | 2.96855  | 3.128542  | 0.264486  |
| C  | 2.766053  | 0.059355  | 1.831305  | C | 3.63304  | 4.325664  | -0.052887 |
| C  | 1.911112  | -0.865537 | 2.572509  | H | 3.173068 | 5.269853  | 0.236943  |
| C  | 2.230653  | -1.139692 | 3.965741  | C | 4.869544 | 4.343789  | -0.704963 |
| C  | 2.952377  | -0.764373 | -0.889043 | C | 5.454786 | 3.107992  | -0.987488 |
| C  | 3.590704  | -2.018482 | -0.618921 | H | 6.442642 | 3.083311  | -1.446027 |
| C  | 3.798023  | -2.964661 | -1.641429 | C | 4.819409 | 1.887826  | -0.688974 |
| H  | 4.294837  | -3.900867 | -1.390099 | C | 1.670685 | 3.282223  | 1.041569  |
| C  | 3.418393  | -2.735586 | -2.96591  | H | 1.634235 | 4.271178  | 1.516453  |



Supplementary Material (ESI) for Dalton Transactions  
This journal is (c) The Royal Society of Chemistry 2008

|   |           |           |           |   |           |           |           |
|---|-----------|-----------|-----------|---|-----------|-----------|-----------|
| H | 1.573408  | 2.522404  | 1.819989  | H | -4.708879 | -3.014711 | 2.408064  |
| H | 0.792478  | 3.185459  | 0.396337  | C | -3.508934 | -1.611339 | 3.506533  |
| C | 5.548726  | 5.645077  | -1.075664 | C | -2.728282 | -0.454926 | 3.392398  |
| H | 6.632879  | 5.514722  | -1.177731 | H | -2.225504 | -0.065448 | 4.273919  |
| H | 5.372038  | 6.420764  | -0.319798 | C | -2.54755  | 0.204016  | 2.170506  |
| H | 5.177764  | 6.039247  | -2.033412 | C | -4.636145 | -2.161941 | -0.081397 |
| C | 5.625514  | 0.637771  | -1.007936 | H | -5.268351 | -2.982885 | 0.274493  |
| H | 5.601778  | -0.085802 | -0.188755 | H | -3.917603 | -2.576912 | -0.795282 |
| H | 6.674628  | 0.906001  | -1.185131 | H | -5.271454 | -1.468637 | -0.641994 |
| H | 5.257038  | 0.118978  | -1.898482 | C | -3.671158 | -2.306742 | 4.839253  |
| C | -1.186897 | -1.714955 | -1.797545 | H | -4.402836 | -3.119735 | 4.780333  |
| C | -0.527016 | -2.746676 | -2.475788 | H | -4.000917 | -1.608739 | 5.619243  |
| H | 0.363659  | -3.190783 | -2.040781 | H | -2.716901 | -2.734779 | 5.173931  |
| C | -0.940327 | -3.23487  | -3.738159 | C | -1.654104 | 1.431929  | 2.183809  |
| H | -0.379579 | -4.032395 | -4.218319 | H | -2.234647 | 2.360519  | 2.154012  |
| C | -2.039068 | -2.678126 | -4.3497   | H | -0.955624 | 1.452537  | 1.343816  |
| H | -2.370529 | -3.019428 | -5.327705 | H | -1.04723  | 1.440511  | 3.094715  |
| C | -3.878546 | -1.065641 | -4.397939 |   |           |           |           |
| H | -4.144697 | -1.469258 | -5.372376 |   |           |           |           |
| C | -4.586538 | -0.023655 | -3.849046 |   |           |           |           |
| H | -5.424773 | 0.422309  | -4.376886 |   |           |           |           |
| C | -4.203866 | 0.476327  | -2.58429  |   |           |           |           |
| H | -4.763753 | 1.311765  | -2.177485 |   |           |           |           |
| C | -3.154024 | -0.064811 | -1.82698  |   |           |           |           |
| C | -2.360326 | -1.13603  | -2.411222 |   |           |           |           |
| C | -2.76117  | -1.628806 | -3.717617 |   |           |           |           |
| C | -3.381029 | 2.117685  | -0.276124 |   |           |           |           |
| C | -4.508843 | 2.655345  | 0.408919  |   |           |           |           |
| C | -4.712314 | 4.044401  | 0.454646  |   |           |           |           |
| H | -5.586574 | 4.430224  | 0.975553  |   |           |           |           |
| C | -3.823366 | 4.943605  | -0.144328 |   |           |           |           |
| C | -2.717613 | 4.414858  | -0.822021 |   |           |           |           |
| H | -2.010689 | 5.092016  | -1.29629  |   |           |           |           |
| C | -2.491531 | 3.03392   | -0.913169 |   |           |           |           |
| C | -5.541265 | 1.778878  | 1.099678  |   |           |           |           |
| H | -5.859348 | 0.936787  | 0.474857  |   |           |           |           |
| H | -6.434232 | 2.365279  | 1.344064  |   |           |           |           |
| H | -5.154285 | 1.352601  | 2.032028  |   |           |           |           |
| C | -4.063518 | 6.437029  | -0.09082  |   |           |           |           |
| H | -4.516841 | 6.804977  | -1.022367 |   |           |           |           |
| H | -3.126054 | 6.987564  | 0.050248  |   |           |           |           |
| H | -4.739298 | 6.703631  | 0.729451  |   |           |           |           |
| C | -1.271345 | 2.561328  | -1.677584 |   |           |           |           |
| H | -0.59769  | 1.954123  | -1.063958 |   |           |           |           |
| H | -0.688585 | 3.414404  | -2.040752 |   |           |           |           |
| H | -1.551888 | 1.952689  | -2.543887 |   |           |           |           |
| C | -3.159873 | -0.301571 | 0.975079  |   |           |           |           |
| C | -3.933334 | -1.501642 | 1.09158   |   |           |           |           |
| C | -4.100191 | -2.115246 | 2.343936  |   |           |           |           |

Supplementary Material (ESI) for Dalton Transactions  
This journal is (c) The Royal Society of Chemistry 2008
